# Supplementary material for: High-efficiency p–n junction oxide photoelectrodes for photoelectrochemical water splitting
Source: Royal Society of Chemistry journal article supplement (doi:10.1039/c6cp06536h), 2016-01-01
Supplement: c6cp06536h1.pdf [file c6cp06536h1.pdf]

Journal: Physical Chemistry Chemical Physics

C6CP06536H: High-efficiency p-n junction oxides photoelectrodes for photoelectrochemical water splitting

**Supplemental information:**

Fig.S1 Linear sweep voltammograms of the  $\text{TiO}_2/\text{Cu}_2\text{O}$  obtained with 120 sec deposition

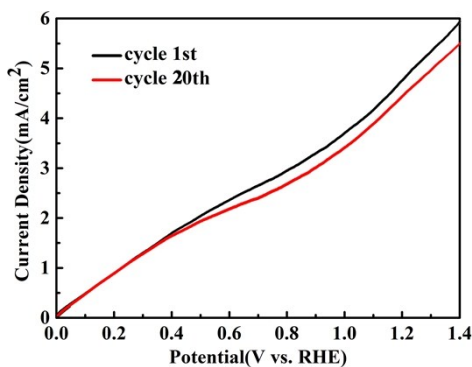

Fig.S1 Linear sweep voltammograms of the  $\text{TiO}_2/\text{Cu}_2\text{O}$  obtained with 120 sec deposition
